# Supplementary material for: HLA-DRB1 Alleles Associated with Lower Leishmaniasis Susceptibility Share Common Amino Acid Polymorphisms and Epitope Binding Repertoires
Source: MDPI journal article supplement (doi:10.3390/vaccines9030270), 2021-03-17
Supplement: s1 [file s1]

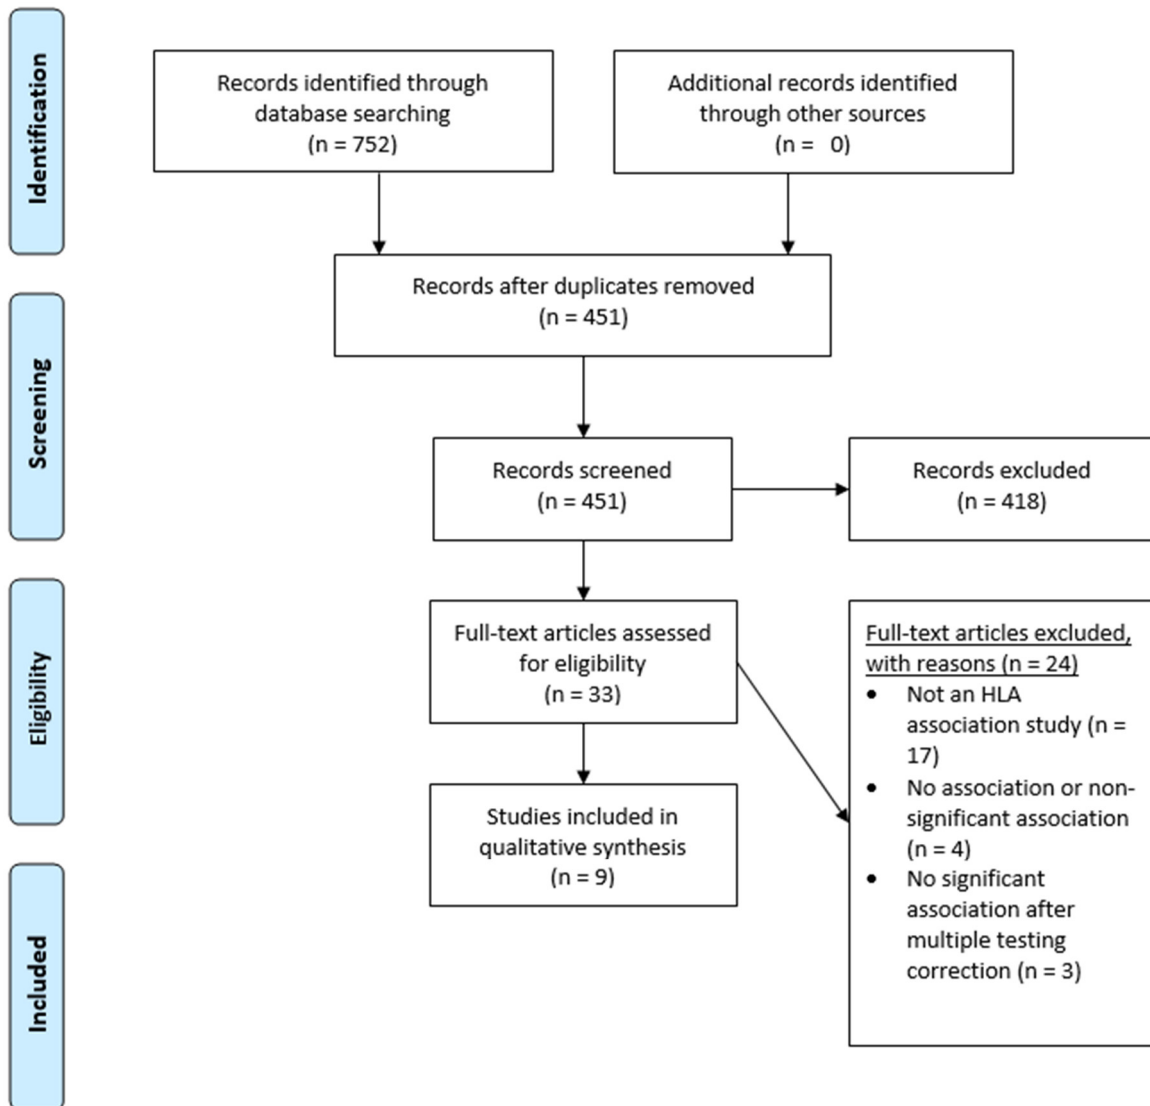

**Figure S1.** The PRISMA Flow Diagram used in this study to describe the literature review workflow [22].

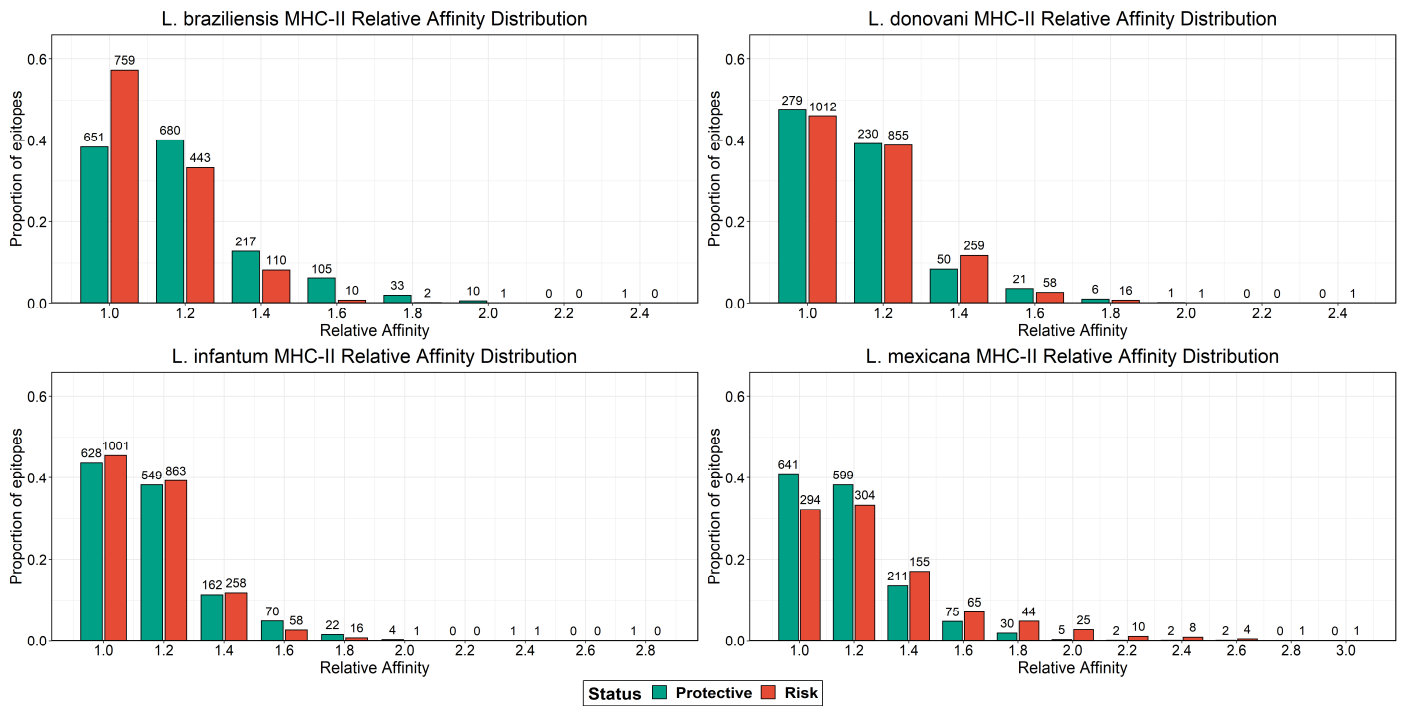

**Figure S2.** Relative affinity distribution plots for the HLA class II alleles associated with *L. braziliensis*, *L. donovani*, *L. infantum* and *L. mexicana*. This plot shows the number of epitopes, and the proportion of epitopes relative to the total number of epitopes, with a specific relative affinity.

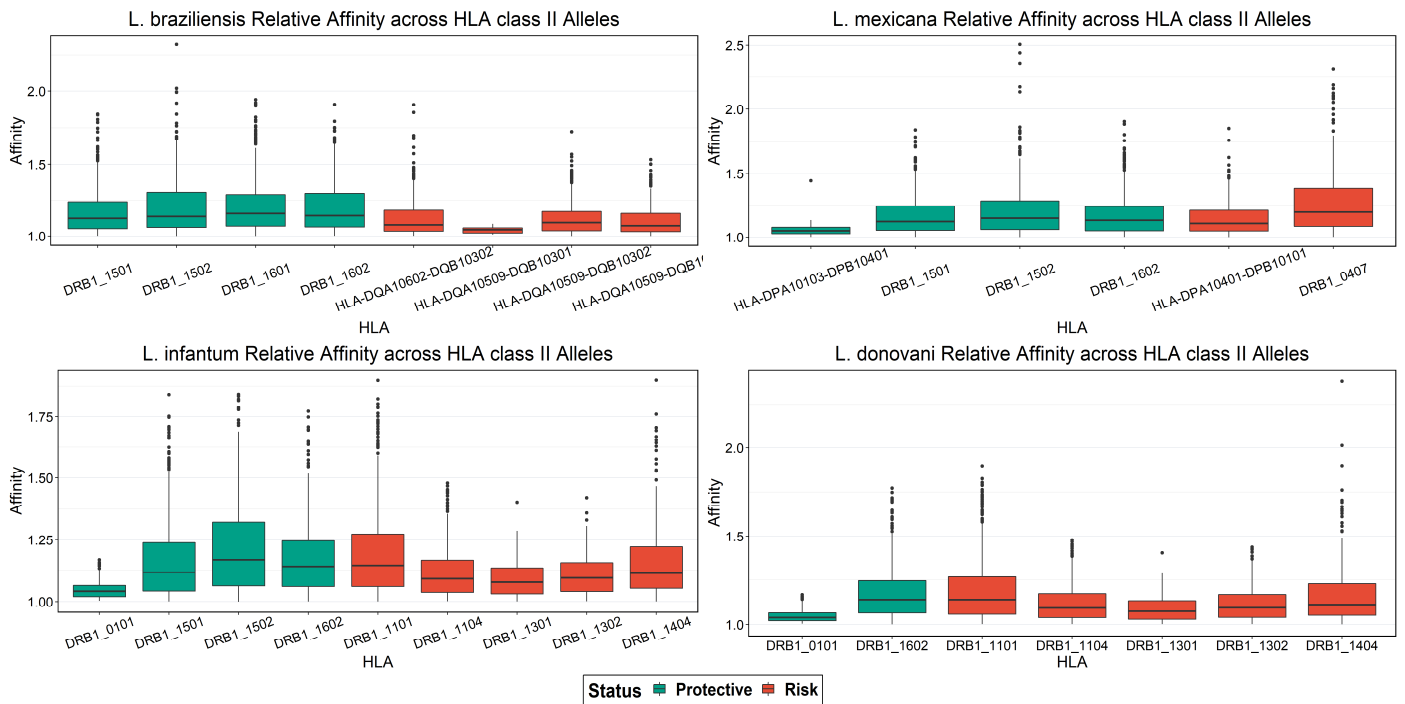

**Figure S3.** Relative affinity distribution across HLA class II alleles associated with protection and risk for *L. braziliensis*, *L. donovani*, *L. infantum* and *L. mexicana*.
